# Supplementary material for: Determinants of Campylobacter species diversity in infants and association with family members, livestock, and household environments in rural Eastern Ethiopia
Source: PubMed Central journal article supplement (PMC11774460; doi:10.21203/rs.3.rs-5672139/v1), 2025-01-15
Supplement: NIHPPrs5672139v1-supplement-1.pdf [file NIHPPrs5672139v1-supplement-1.pdf]

## Supplementary Files

This is a list of supplementary files associated with this preprint. Click to download.

- [Cagedsppsupplemental121724.pdf](#)
